# Supplementary material for: Derivation of adult canine intestinal organoids for translational research in gastroenterology
Source: PubMed Central journal article supplement (PMC6460554; doi:10.1186/s12915-019-0652-6), 2019-04-11
Supplement: 12915_2019_652_MOESM1_ESM.pdf [file 12915_2019_652_MOESM1_ESM.pdf]

**Additional file 1: Table S1.** Details of dogs used for isolation, propagation and preservation of canine 3D intestinal organoids.

|     |                               |           |              |                                | # of vials archived |         |       |       |
|-----|-------------------------------|-----------|--------------|--------------------------------|---------------------|---------|-------|-------|
|     | Type of Dog                   | # of Dogs | Tissue type  | Tissue site/location           | Duodenum            | Jejunum | Ileum | Colon |
| 1   | Healthy                       | 20        | Whole tissue | 15 dogs: Jejunum               |                     | 78      |       |       |
|     |                               |           |              | 5 dogs: Duodenum, Ileum, Colon | 2                   |         | 14    | 15    |
| 2   | Healthy Nutrition Study Dogs: |           |              |                                |                     |         |       |       |
| 2.a | Pre-treatment                 | 8         | Biopsy       | Duodenum, Ileum, Colon         | 23                  |         | 30    | 26    |
| 2.b | Post-treatment                | 8         | Biopsy       | Duodenum, Ileum, Colon         | 39                  |         | 56    | 58    |
| 3   | IBD Dogs                      | 9         | Biopsy       | Duodenum, Ileum, Colon         | 8                   |         | 13    | 14    |
| 4   | Lysosyme storage mutation     | 1         | Whole tissue | Duodenum, Ileum, Colon         |                     |         | 4     | 4     |
| 5   | Tumor                         | 2         | Biopsy       |                                | 5                   |         | 2     | 2     |

Definitions: Biopsy, endoscopically obtained biopsy tissue; IBD, inflammatory bowel disease; Nutrition Dogs, healthy dogs before and after diet treatment.
