# Supplementary material for: Derivation of adult canine intestinal organoids for translational research in gastroenterology
Source: PubMed Central journal article supplement (PMC6460554; doi:10.1186/s12915-019-0652-6), 2019-04-11
Supplement: 12915_2019_652_MOESM2_ESM.pdf [file 12915_2019_652_MOESM2_ESM.pdf]

**Additional file 2: Table S2.** IHC antibody, dilution and incubation time.

| <b>Primary Ab</b> | <b>Source</b> | <b>Pretreatment</b>               | <b>Dilution</b> | <b>Incubation</b> | <b>Secondary Ab</b>              |
|-------------------|---------------|-----------------------------------|-----------------|-------------------|----------------------------------|
| Keratin (alt)     | Dako          | Tris-EDTA pH 9.0,<br>20 min steam | 1:100           | 90 min            | goat anti-mouse<br>(Multi-Link)  |
| T-cell (CD3)      | Dako          | Tris-EDTA pH 9.0,<br>20 min steam | 1:100           | 90 min            | goat anti-rabbit<br>Multi-Link)  |
| Vimentin          | Dako          | Citra pH 6.0, 5 min               | 1:500           | 30 min            | goat anti-mouse<br>(Multi-Link)  |
| Chromogranin A    | Santa<br>Cruz | Tris-EDTA pH 9.0,<br>20 min steam | 1:100           | 60 min            | Vector, Gt. ABC<br>kit           |
| CD117, c-kit      | Dako          | Tris-EDTA pH 9.0,<br>20 min steam | 1:500           | 120 min           | goat anti-rabbit<br>(Multi-Link) |
| Actin (sm)        | BioGenix      | None                              | 1:200           | 30 min            | goat anti-mouse<br>(Multi-Link)  |
| Lysozyme          | Dako          | Tris-EDTA pH 9.0,<br>20 min steam | 1:100           | 90 min            | goat anti-rabbit<br>Multi-Link)  |
